# Supplementary material for: Hypoglycemic and hypolipidemic activity of aqueous leaf extract of Passiflora suberosa L
Source: PeerJ. 2018 Feb 20;6:e4389. doi: 10.7717/peerj.4389 (PMC5824672; doi:10.7717/peerj.4389)
Supplement: File S2 — Data are given for 9 animals. [file peerj-06-4389-s002.xlsx]

## Sheet: Sheet1
	Fasting blood sugar		Chronic treatment)
	Control						ALE
Animal	pre	1hr	3hr	5hr		pre	1hr	3hr	5hr
1	125.41	119.92	128.35	116.55		121.86	127.29	130.22	131.94
2	116.82	126.21	123.73	126.05		124.77	126.92	131.5	132.76
3	117.41	122.52	112.74	117.83		120.89	124.85	130.51	130.77
4	115.46	123.69	120.65	121.63		119.98	126.82	128.83	132.74
5	120.26	120.28	136.26	130.68		124.83	127.33	131.29	130.68
6	128.42	124.31	124.39	136.42		126.48	127.62	128.66	133.73
7	121.75	117.93	131.65	126.55		128.03	131.08	131.02	133.33
8	124.7	120.72	129.01	132.67		127.72	130.02	132.53	132.91
9	123.84	126.84	125.84	129.66		124.37	127.52	131.49	133
		Glucose tolerance
		Control					ALE
Animal	pre	1hr	3h	5hr		pre	1hr	3hr	5hr
1	92.91	152.34	126.72	96.39		96.2	147.98	120.83	94.7
2	88.54	145.88	128.44	91.06		94.88	139.78	121.3	93.67
3	87.32	143.9	130.24	95.35		83.91	133.55	122.83	91.4
4	84.48	150.27	136.39	93.51		86.4	141.9	116.66	93.5
5	88.48	142.39	131.05	93.92		91.3	150.03	118.4	98.33
6	94.69	146.61	134.59	96.5		93.5	143.96	126.38	92.74
7	90.02	156.2	135.5	98.02		95.57	148.29	114.78	93.79
8	94.61	152.57	138.4	99.3		92.73	144.61	126.05	96.2
9	96.3	148.77	130.21	100.61		85.02	140.33	121.95	96.88
	Sucrose Tolerance
		Control					ALE
Animal	pre	1h	3hr	5hr		pre	1hr	3hr	5hr
1	96.12	125.62	120.64	106.02		97.84	131.85	108.42	87.26
2	98.65	127.76	117.86	104.92		96.92	131.72	98.26	84.57
3	93.74	125.88	119.72	115.61		98.73	128.79	96.67	86.84
4	95.21	126.61	112.65	105.53		98.98	129.74	110.61	84.76
5	102.61	131.47	109.63	101.27		96.85	127.92	102.22	86.25
6	95.33	129.91	116.66	100.43		99.75	129.88	95.33	83.81
7	96.77	135.58	118.84	101.12		98.79	130.24	100.61	83.71
8	99.08	111.85	108.83	100.61		99.93	135.71	96.03	84.37
9	97.19	125.74	115.79	104.61		100.36	132.47	101.15	85.17
	Glucose absorption from the intestine						Diphragm uptake			liver glucose uptake			Skeletal muscle glucose uptake
Animal	control	ALE			Animal	control	test			control	test		control	test
1	16.23	90.46			1	33.2	33			1.5	3.85		3	6.82
2	20.62	94.07			2	34.5	32.9			1.4	3.7		3.11	7.13
3	13.4	95.62			3	35.2	33.12			1.33	4.1		3.06	6.88
4	23.97	82.99			4	33.5	31.36			1.52	3.9		3.09	7.23
5	10.05	72.42			5	32.33	34.35			1.63	4.29		3.12	6.11
6	14.95	85.05			6	33.89	30.2			1.39	4.2		3.2	6.73
7	17.78	75			7	34.33	33.8			1.14	3.7		2.81	7.5
8	23.71	80.41			8	34.2	33.6			1.63	3.83		2.86	7.23
9	17.59	84.5			9	34	33.1			1.25	2.83		2.91	6.18
	TC			TG			HDL			LDL
Animal	control	test		control	test		control	test		control	test
1	196	163		80.23	90.93		33.62	32		14	12.85
2	196	165		86.04	70.69		31.83	37.17		14.26	15.15
3	194	152		90.69	56.97		38.46	31.65		18.49	16.24
4	198	153		72.09	51.16		39.21	36.41		15.18	15.2
5	193	171		91.86	54.65		34.71	30.83		16.35	13.93
6	193	166		41.86	58.14		31.73	38.41		19.3	16.88
7	195	161		97.67	60.46		39.56	33.16		15.02	12.68
8	190	151		61.63	65.12		33.01	36.23		15.04	16.37
9	197	169		48.83	81.39		31.47	31.23		14.04	13.27
			ALT			AST
	Animal	control	test
	1	20.08	22.58			11,76	13.14
	2	20.31	22.61			12.74	11.23
	3	20.32	21.82			12.1	12.24
	4	20.16	22.05			11,64	11.62
	5	22.51	22.5			11.64	11.95
	6	22.31	20.89			12.3	11.83
	7	21.48	21.04			12.74	17.25
	8	22.54	21.27			13.65	13.5
	9	22.13	21.33			13.43	12.2
